# Supplementary material
Source: publisher site journal article supplement (https://www.dovepress.com/article/262896)

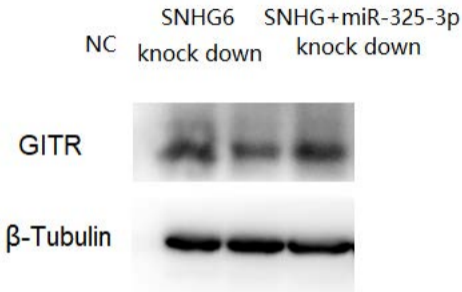

Figure S1: GITR expression detected by western blot in MKN45 cell line

Supplement: Supplementary file 1 [file get_supplementary_file.php]
